# Supplementary material for: Incidence and Predictors for Oncologic Etiologies in Chinese Children with Pituitary Stalk Thickening
Source: MDPI journal article supplement (doi:10.3390/cancers15153935), 2023-08-02
Supplement: s1 [file s1]

**Supplementary Table S1.** Baseline Demographics of non-neoplastic versus neoplastic groups.

|                                                           |                                 | Idiopathic<br>(n=14) | Neoplastic<br>causes<br>(n=14) | Total              |
|-----------------------------------------------------------|---------------------------------|----------------------|--------------------------------|--------------------|
| Sex                                                       | Female                          | 12 (85.7%)           | 6 (42.9%)                      | 18                 |
|                                                           | Male                            | 2 (14.3%)            | 8 (57.1%)                      | 10                 |
| Age at first symptoms<br>(median and range in<br>years)   |                                 | 9.3<br>(3.6–16)      | 11<br>(5–16.3)                 | 9.7<br>(3.6–16.3)  |
| Age at diagnosis of PST<br>(median and range in<br>years) |                                 | 10.7<br>(3.8–16.2)   | 11.1<br>(5.2–16.5)             | 10.9<br>(3.8–16.5) |
| Presenting Symptoms                                       | Polyuria/polydipsia             | 4                    | 13                             | 17                 |
|                                                           | Growth retardation              | 2                    | 7                              | 9                  |
|                                                           | Precocious puberty              | 7                    | 1                              | 8                  |
|                                                           | Delayed puberty                 | 2                    | 3                              | 5                  |
|                                                           | Headache                        | 2                    | 3                              | 5                  |
|                                                           | Visual problems                 | 4                    | 5                              | 9                  |
|                                                           | Weight loss                     | 1                    | 2                              | 3                  |
|                                                           | Lethargy                        | 1                    | 2                              | 3                  |
|                                                           | Dizziness                       | 0                    | 1                              | 1                  |
|                                                           | Poor appetite                   | 2                    | 1                              | 3                  |
|                                                           | Decrease libido                 | 0                    | 1                              | 1                  |
| Visual Problems                                           | Visual field                    | 1                    | 1                              | 2                  |
|                                                           | Visual acuity                   | 0                    | 0                              | 0                  |
|                                                           | Papilledema                     | 0                    | 1                              | 1                  |
|                                                           | Exotropia/diplopia              | 2                    | 2                              | 4                  |
|                                                           | Parinaud syndrome               | 0                    | 1                              | 1                  |
|                                                           | Raised intra-ocular<br>pressure | 0<br>1               | 1<br>0                         | 1<br>1             |
|                                                           | Amblyopia                       |                      |                                |                    |
| Biopsy performed                                          | No                              | 14 (100%)            | 3 (21.4%)                      | 17                 |
|                                                           | Yes                             | 0 (0%)               | 11 (78.6%)                     | 11                 |
| Stalk thickness at<br>initial MRI                         | Mild (<4mm)                     | 11 (78.6%)           | 4 (28.6%)                      | 15                 |
|                                                           | Moderate (4mm-<6.5mm)           | 3 (21.4%)            | 5 (35.7%)                      | 8                  |
|                                                           | Severe (≥6.5mm)                 | 0 (0%)               | 5 (35.7%)                      | 5                  |
| Maximal stalk<br>thickness during FU                      | <6.5mm                          | 14 (100%)            | 2 ( 14.3 %)                    | 16                 |
|                                                           | ≥6.5mm                          | 0 (0%)               | 12 (85.7 %)                    | 12                 |
| Outcome                                                   | Alive                           | 14                   | 13                             | 27                 |
|                                                           | Died                            | 0                    | 1                              | 1                  |
